# Supplementary material
Source: PubMed Central journal article supplement (PMC5696017)
Supplement: NIHMS899541-supplement.pdf [file NIHMS899541-supplement.pdf]

**Appendix**  
**Softening Among U.S. Smokers With Psychological Distress: More Quit Attempts**  
**and Lower Consumption as Smoking Drops**  
**Kulik and Glantz**

**Appendix Table 1.** Data Characteristics: NHIS 1997–2015

| Year  | Adult sample, n | Total sample (574,690)    |                   |                  | Current smokers (118,604) |                   |                  |
|-------|-----------------|---------------------------|-------------------|------------------|---------------------------|-------------------|------------------|
|       |                 | No psychological distress | Moderate distress | Serious distress | No psychological distress | Moderate distress | Serious distress |
| 1997  | 36,116          | 28,054                    | 6,159             | 1,409            | 6,267                     | 1,948             | 591              |
| 1998  | 32,440          | 25,552                    | 5,229             | 1,130            | 5,466                     | 1,700             | 463              |
| 1999  | 30,801          | 25,193                    | 4,244             | 867              | 5,399                     | 1,334             | 367              |
| 2000  | 32,374          | 26,141                    | 4,666             | 991              | 5,407                     | 1,519             | 395              |
| 2001  | 33,326          | 25,357                    | 5,861             | 1,179            | 5,174                     | 1,847             | 467              |
| 2002  | 31,044          | 24,980                    | 4,357             | 1,024            | 4,995                     | 1,360             | 460              |
| 2003  | 30,852          | 24,350                    | 4,703             | 1,101            | 4,630                     | 1,433             | 465              |
| 2004  | 31,326          | 24,744                    | 4,842             | 1,112            | 4,566                     | 1,396             | 469              |
| 2005  | 31,428          | 24,943                    | 4,852             | 1,084            | 4,608                     | 1,372             | 451              |
| 2006  | 24,275          | 19,426                    | 3,572             | 781              | 3,426                     | 1,045             | 324              |
| 2007  | 23,393          | 19,101                    | 3,205             | 671              | 3,129                     | 936               | 258              |
| 2008  | 21,781          | 17,214                    | 3,528             | 752              | 2,962                     | 1,058             | 320              |
| 2009  | 27,731          | 21,932                    | 4,554             | 956              | 3,747                     | 1,357             | 423              |
| 2010  | 27,157          | 21,274                    | 4,610             | 1,023            | 3,463                     | 1,259             | 394              |
| 2011  | 33,014          | 26,183                    | 5,300             | 1,252            | 4,168                     | 1,510             | 519              |
| 2012  | 34,525          | 28,101                    | 5,024             | 1,181            | 4,479                     | 1,450             | 475              |
| 2013  | 34,557          | 25,947                    | 5,927             | 1,406            | 3,965                     | 1,470             | 552              |
| 2014  | 36,697          | 28,275                    | 5,866             | 1,249            | 4,243                     | 1,480             | 464              |
| 2015  | 33,672          | 25,266                    | 5,772             | 1,218            | 3,360                     | 1,334             | 485              |
| Total | 586,509         | 462,033                   | 92,271            | 20,386           | 83,454                    | 26,808            | 8,342            |

NHIS, National Health Interview Survey

**Appendix**  
**Softening Among U.S. Smokers With Psychological Distress: More Quit Attempts**  
**and Lower Consumption as Smoking Drops**  
**Kulik and Glantz**

**Appendix Table 2.** Smoking Prevalence/Current Smoker (OR and 95% CIs From Logistic Regression)

| Covariates and model fit            | No psychological distress  |                            | Moderate psychological distress |                            | Serious psychological distress |                            |
|-------------------------------------|----------------------------|----------------------------|---------------------------------|----------------------------|--------------------------------|----------------------------|
|                                     | Unadjusted                 | Adjusted                   | Unadjusted                      | Adjusted                   | Unadjusted                     | Adjusted                   |
| Time (per 10 years) <sup>a</sup>    | <b>0.72 (0.71, 0.74)**</b> | <b>0.80 (0.78, 0.82)**</b> | <b>0.81 (0.78, 0.84)**</b>      | <b>0.90 (0.87, 0.94)**</b> | <b>0.92 (0.86, 0.98)**</b>     | 0.97 (0.90, 1.04)          |
| Gender                              |                            |                            |                                 |                            |                                |                            |
| Male                                |                            | 1                          |                                 | 1                          |                                | 1                          |
| Female                              |                            | <b>0.77 (0.75, 0.79)**</b> |                                 | <b>0.85 (0.81, 0.88)**</b> |                                | <b>0.82 (0.75, 0.89)**</b> |
| Age                                 |                            | <b>0.98 (0.98, 0.99)**</b> |                                 | <b>0.98 (0.97, 0.98)**</b> |                                | <b>0.97 (0.97, 0.97)**</b> |
| Marital status                      |                            |                            |                                 |                            |                                |                            |
| Married/Living with partner         |                            | 1                          |                                 | 1                          |                                | 1                          |
| Never married                       |                            | <b>0.96 (0.93, 0.99)**</b> |                                 | <b>0.92 (0.87, 0.97)**</b> |                                | <b>0.86 (0.76, 0.96)**</b> |
| Widowed/Divorced/Separated          |                            | <b>1.72 (1.68, 1.76)**</b> |                                 | <b>1.57 (1.50, 1.65)**</b> |                                | <b>1.55 (1.41, 1.70)**</b> |
| Alcohol use                         |                            |                            |                                 |                            |                                |                            |
| Current drinker                     |                            | 1                          |                                 | 1                          |                                | 1                          |
| Former drinker                      |                            | <b>0.76 (0.74, 0.79)**</b> |                                 | <b>0.79 (0.74, 0.83)**</b> |                                | <b>0.78 (0.71, 0.86)**</b> |
| Lifetime abstainer                  |                            | <b>0.25 (0.24, 0.26)**</b> |                                 | <b>0.24 (0.23, 0.26)**</b> |                                | <b>0.29 (0.26, 0.33)**</b> |
| Educational level                   |                            |                            |                                 |                            |                                |                            |
| 0–11 years/12 years without diploma |                            | 1                          |                                 | 1                          |                                | 1                          |
| HS diploma/GED or equivalent        |                            | <b>0.74 (0.72, 0.76)**</b> |                                 | <b>0.75 (0.71, 0.80)**</b> |                                | <b>0.82 (0.74, 0.91)**</b> |
| Some college/AA degree              |                            | <b>0.45 (0.44, 0.47)**</b> |                                 | <b>0.49 (0.46, 0.52)**</b> |                                | <b>0.52 (0.47, 0.58)**</b> |
| BA degree and higher                |                            | <b>0.17 (0.17, 0.18)**</b> |                                 | <b>0.20 (0.19, 0.22)**</b> |                                | <b>0.26 (0.22, 0.30)**</b> |
| Race/Ethnicity                      |                            |                            |                                 |                            |                                |                            |
| Non-Hispanic white                  |                            | 1                          |                                 | 1                          |                                | 1                          |
| Non-Hispanic black                  |                            | <b>0.86 (0.83, 0.89)**</b> |                                 | <b>0.77 (0.73, 0.82)**</b> |                                | <b>0.77 (0.69, 0.86)**</b> |
| Hispanic                            |                            | <b>0.43 (0.42, 0.45)**</b> |                                 | <b>0.38 (0.35, 0.40)**</b> |                                | <b>0.37 (0.33, 0.42)**</b> |
| Non-Hispanic all other race groups  |                            | <b>0.86 (0.81, 0.91)**</b> |                                 | <b>0.76 (0.68, 0.86)**</b> |                                | <b>0.63 (0.49, 0.79)**</b> |
| Constant                            | 0.22 (0.22, 0.22)          | <b>1.96 (1.87, 2.06)**</b> | 0.42 (0.41, 0.43)               | <b>3.32 (3.03, 3.64)**</b> | 0.73 (0.70, 0.76)              | <b>7.24 (6.01, 8.72)**</b> |
| Model fit <i>p</i> -value           | <i>p</i> <0.01             | <i>p</i> <0.01             | <i>p</i> <0.01                  | <i>p</i> <0.01             | <i>p</i> <0.01                 | <i>p</i> <0.01             |

Notes: Boldface indicates statistical significance (\**p*<0.05; \*\**p*<0.01).

<sup>a</sup> Year centered on 2006 (−9 to 9), and divided by 10.

HS, High School; GED, General Educational Development (High School Equivalency); AA, Associate; BA, Bachelor

**Appendix**  
**Softening Among U.S. Smokers With Psychological Distress: More Quit Attempts**  
**and Lower Consumption as Smoking Drops**  
**Kulik and Glantz**

**Appendix Table 3.** Quit Attempts, Consumption, and Smoking Prevalence (Coefficients and 95% CIs)

| Covariates and model fit                       | Smoking prevalence/Current smoker<br>(Logistic regression) | Proportion with at least one quit<br>attempt in past 12 months<br>(Logistic regression) | Consumption cigarettes/day<br>(Linear regression) |
|------------------------------------------------|------------------------------------------------------------|-----------------------------------------------------------------------------------------|---------------------------------------------------|
| Time (per 10 years) <sup>a</sup>               | <b>0.80 (0.78, 0.82)**</b>                                 | <b>1.13 (1.09, 1.17)**</b>                                                              | <b>-2.78 (-2.93, -2.63)**</b>                     |
| Psychological distress status: Kessler 6 scale |                                                            |                                                                                         |                                                   |
| No distress (0–4 points)                       | 1                                                          | 1                                                                                       | 1                                                 |
| Moderate psychological distress (5–12 points)  | <b>1.65 (1.61, 1.69)**</b>                                 | <b>1.39 (1.34, 1.44)**</b>                                                              | <b>1.36 (1.19, 1.54)**</b>                        |
| Serious psychological distress (13–24 points)  | <b>2.78 (2.67, 2.90)**</b>                                 | <b>1.44 (1.35, 1.53)**</b>                                                              | <b>3.71 (3.38, 4.04)**</b>                        |
| Interaction of K-6 level and time              |                                                            |                                                                                         |                                                   |
| No distress * time                             | 1                                                          | 1                                                                                       | 1                                                 |
| Moderate psychological distress * time         | <b>1.12 (1.08, 1.17)**</b>                                 | 1.01 (0.95, 1.08)                                                                       | <b>-0.37 (-0.67, -0.07)*</b>                      |
| Serious psychological distress * time          | <b>1.20 (1.12, 1.28)**</b>                                 | 0.99 (0.90, 1.10)                                                                       | -0.54 (-1.14, 0.06)                               |
| Gender                                         |                                                            |                                                                                         |                                                   |
| Male                                           | 1                                                          | 1                                                                                       | 1                                                 |
| Female                                         | <b>0.78 (0.77, 0.80)**</b>                                 | <b>1.08 (1.05, 1.12)**</b>                                                              | <b>-2.96 (-3.10, -2.82)**</b>                     |
| Age                                            | <b>0.98 (0.98, 0.98)**</b>                                 | <b>0.99 (0.99, 0.99)**</b>                                                              | <b>0.09 (0.08, 0.10)**</b>                        |
| Marital status                                 |                                                            |                                                                                         |                                                   |
| Married/Living with partner                    | 1                                                          | 1                                                                                       | 1                                                 |
| Never married                                  | <b>0.94 (0.92, 0.97)**</b>                                 | <b>0.93 (0.89, 0.97)**</b>                                                              | <b>-1.34 (-1.50, -1.17)**</b>                     |
| Widowed/Divorced/Separated                     | <b>1.68 (1.64, 1.71)**</b>                                 | 1.01 (0.97, 1.05)                                                                       | 0.16 (-0.01, 0.34)                                |
| Alcohol use                                    |                                                            |                                                                                         |                                                   |
| Current drinker                                | 1                                                          | 1                                                                                       | 1                                                 |
| Former drinker                                 | <b>0.77 (0.75, 0.79)**</b>                                 | 1.00 (0.96, 1.04)                                                                       | <b>1.10 (0.89, 1.31)**</b>                        |
| Lifetime abstainer                             | <b>0.25 (0.24, 0.26)**</b>                                 | <b>0.86 (0.81, 0.91)**</b>                                                              | -0.13 (-0.38, 0.12)                               |
| Educational level                              |                                                            |                                                                                         |                                                   |
| 0–11 years/12 years without diploma            | 1                                                          | 1                                                                                       | 1                                                 |
| HS diploma/GED or equivalent                   | <b>0.75 (0.73, -0.77)**</b>                                | <b>1.05 (1.01, 1.10)*</b>                                                               | <b>-0.87 (-1.07, -0.67)**</b>                     |
| Some college/AA degree                         | <b>0.46 (0.45, 0.48)**</b>                                 | <b>1.30 (1.24, 1.36)**</b>                                                              | <b>-2.11 (-2.32, -1.91)**</b>                     |
| BA degree and higher                           | <b>0.18 (0.18, 0.19)**</b>                                 | <b>1.29 (1.22, 1.36)**</b>                                                              | <b>-4.86 (-5.11, -4.62)**</b>                     |
| Race/Ethnicity                                 |                                                            |                                                                                         |                                                   |
| Non-Hispanic white                             | 1                                                          | 1                                                                                       | 1                                                 |
| Non-Hispanic black                             | <b>0.84 (0.81, 0.86)**</b>                                 | <b>1.33 (1.27, 1.40)**</b>                                                              | <b>-5.36 (-5.54, -5.11)**</b>                     |
| Hispanic                                       | <b>0.42 (0.41, 0.43)**</b>                                 | <b>1.16 (1.10, 1.22)**</b>                                                              | <b>-7.82 (-8.03, -7.61)**</b>                     |
| Non-Hispanic all other race groups             | <b>0.83 (0.79, 0.87)**</b>                                 | <b>1.16 (1.06, 1.26)**</b>                                                              | <b>-4.39 (-4.74, -4.03)**</b>                     |
| Constant                                       | <b>1.99 (1.91, 2.07)**</b>                                 | <b>1.09 (1.02, 1.17)*</b>                                                               | <b>14.36 (14.04, 14.68)**</b>                     |
| Model fit R <sup>2</sup>                       |                                                            |                                                                                         | 0.17                                              |
| Model fit <i>p</i> -value                      | <i>p</i> <0.01                                             | <i>p</i> <0.01                                                                          | <i>p</i> <0.01                                    |

Notes: Boldface indicates statistical significance (\**p*<0.05; \*\**p*<0.01).

<sup>a</sup> Year centered on 2006 (–9 to 9), and divided by 10.

HS, High School; GED, General Educational Development (High School Equivalency); AA, Associate; BA, Bachelor
